# Supplementary material
Source: publisher site journal article supplement (https://www.spandidos-publications.com/6879/downloadSupplementary)

Figure S1. ROC curve indicating performance of the prediction model and PCT using both the training set and validation set. ROC, receiver operating characteristic; AUC, area under the ROC curve; FPR, false-positive rate; TPR, true-positive rate; PCT, procalcitonin.

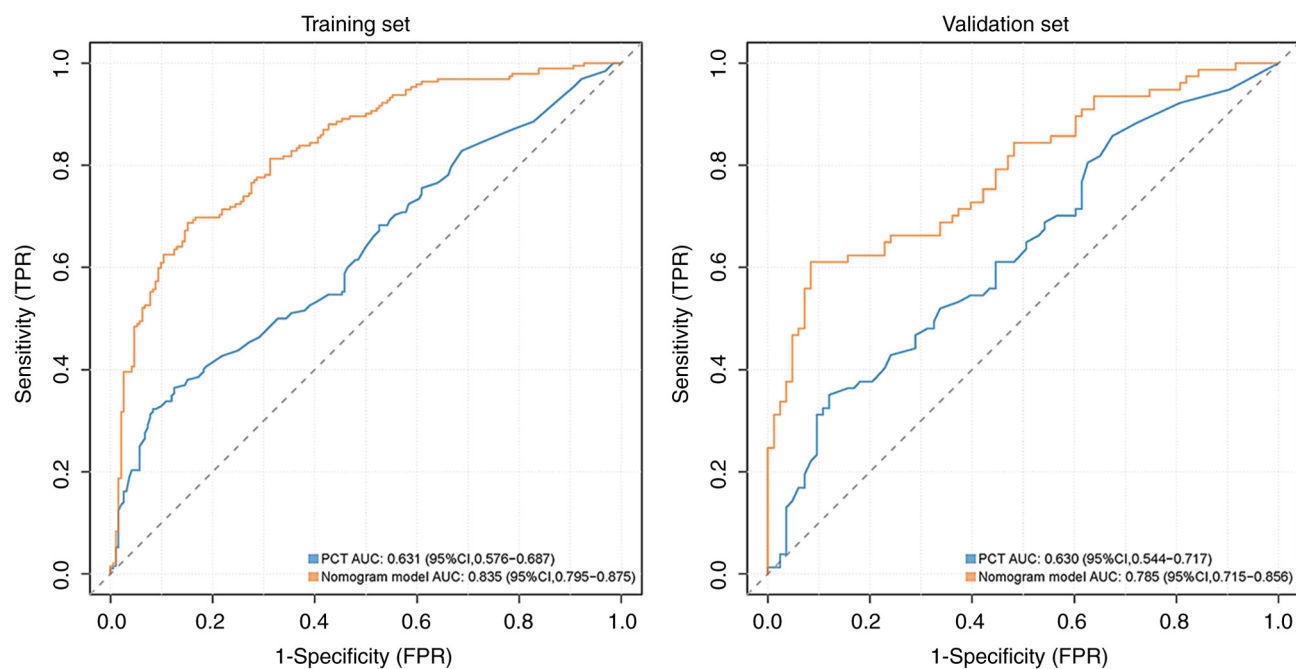

Supplement: Supplementary file 1 [file downloadSupplementary]
